# Supplementary material for: Proinflammatory signaling in islet β cells propagates invasion of pathogenic immune cells in autoimmune diabetes
Source: PubMed Central journal article supplement — Cell Rep. Author manuscript; Available in PMC 2022 Jul 20. (PMC9297711; doi:10.1016/j.celrep.2022.111011), 2022-06-28
Supplement: NIHMS1819962-supplement-1.pdf [file NIHMS1819962-supplement-1.pdf]

## **Supplemental information**

### **Proinflammatory signaling in islet $\beta$ cells**

### **propagates invasion of pathogenic**

### **immune cells in autoimmune diabetes**

**Annie R. Piñeros, Abhishek Kulkarni, Hongyu Gao, Kara S. Orr, Lindsey Glenn, Fei Huang, Yunlong Liu, Maureen Gannon, Farooq Syed, Wenting Wu, Cara M. Anderson, Carmella Evans-Molina, Marcia McDuffie, Jerry L. Nadler, Margaret A. Morris, Raghavendra G. Mirmira, and Sarah A. Tersey**

## **Supplemental information**

### **Proinflammatory signaling in islet $\beta$ cells**

#### **propagates invasion of pathogenic**

#### **immune cells in autoimmune diabetes**

**Annie R. Piñeros, Abhishek Kulkarni, Hongyu Gao, Kara S. Orr, Lindsey Glenn, Fei Huang, Yunlong Liu, Maureen Gannon, Farooq Syed, Wenting Wu, Cara M. Anderson, Carmella Evans-Molina, Marcia McDuffie, Jerry L. Nadler, Margaret A. Morris, Raghavendra G. Mirmira, and Sarah A. Tersey**

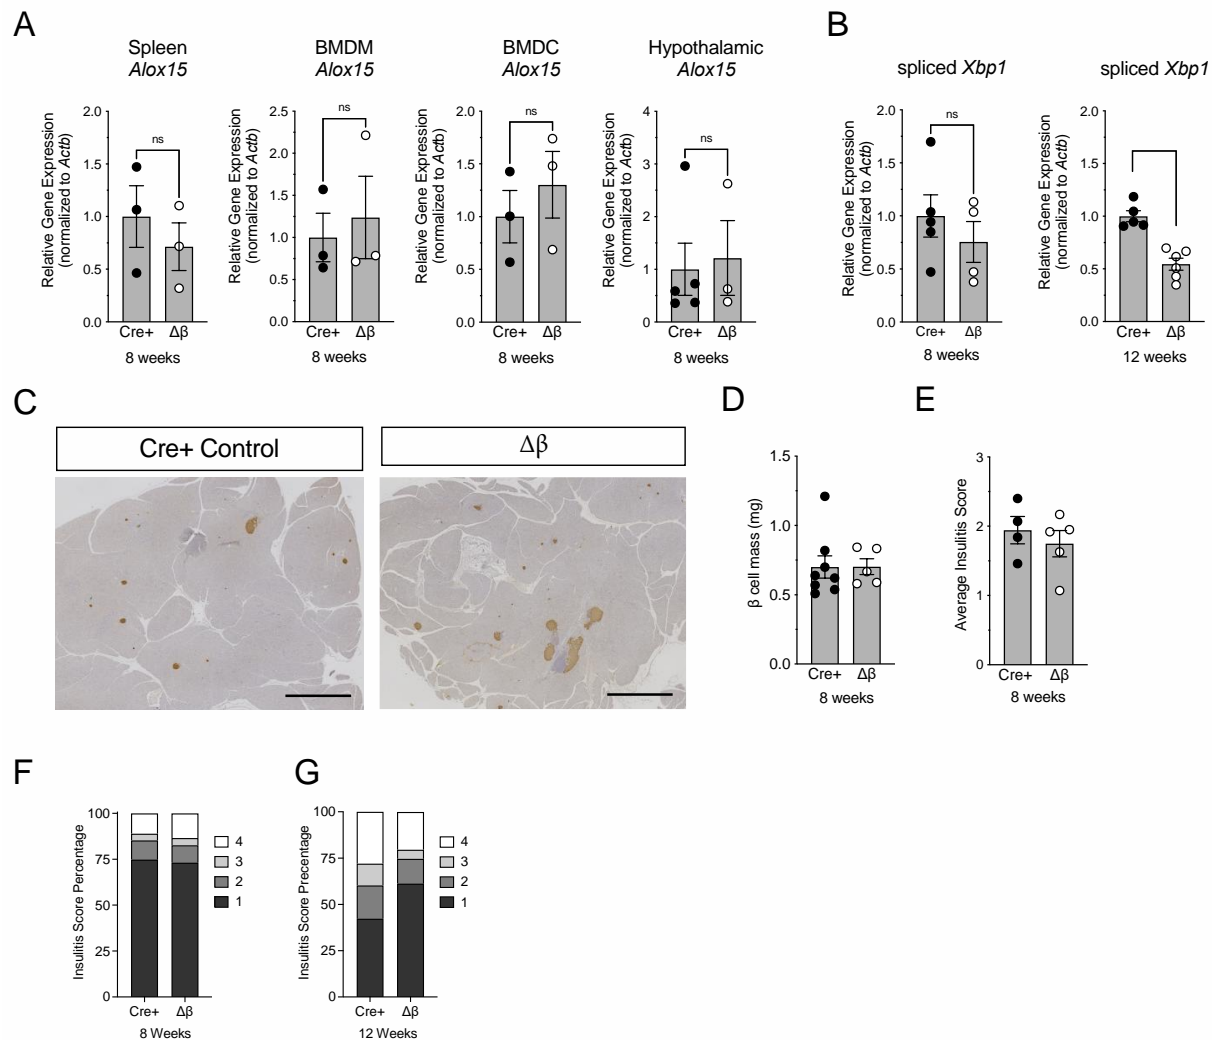

**Supplemental Figure S1: β cell-specific deletion of Alox15 protects against development of T1D in NOD mice, related to Figure 2.** *NOD-Alox15lox<sup>+</sup>/+* mice were crossed with *NOD-Pdx1PB-CreERTM* mice to generate *NOD-Cre<sup>+</sup>* and *NOD-Δβ* mice. At 6 weeks of age, the mice were administered 3 daily intraperitoneal injections of 2.5 mg of tamoxifen. (A) Quantitative RT-PCR from RNA isolated from the spleen, BMDM (bone marrow-derived macrophages), BMDC (bone marrow-derived dendritic cells), or hypothalamus at 8 weeks of age for *Alox15*. (B) Quantitative RT-PCR from isolated islets at 8 or 12 weeks of age for spliced *Xbp1*. (C) Images of whole pancreatic sections from representative mice at 8 weeks of age, immunostained for insulin (brown) and counterstained with hematoxylin. Scale bars, 500 μm. (D) Quantification of β-cell mass. (E) Average insulinitis score. (F) Insulitis score distribution percentage at 8 weeks of age. (G) Insulitis score distribution percentage at 12 weeks of age. Data are expressed as the mean ± SEM. \*P < 0.05.

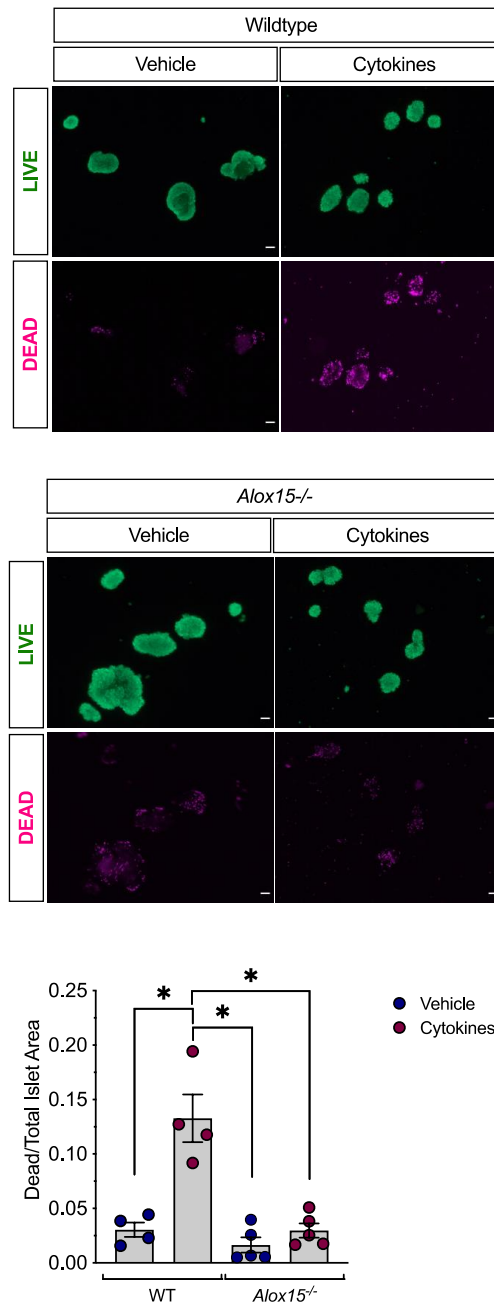

**Supplemental Figure S2: Knockout of *Alox15* protected  $\beta$  cells from cytokine-induced death, related to Figure 2.** Isolated islets were treated with and without cytokines mixture and live and dead cell area was quantitated. Representative images of islets from wildtype and *Alox15*<sup>-/-</sup> islets stained for live cells (green) and dead cells (magenta). Scale bars, 100  $\mu$ m.

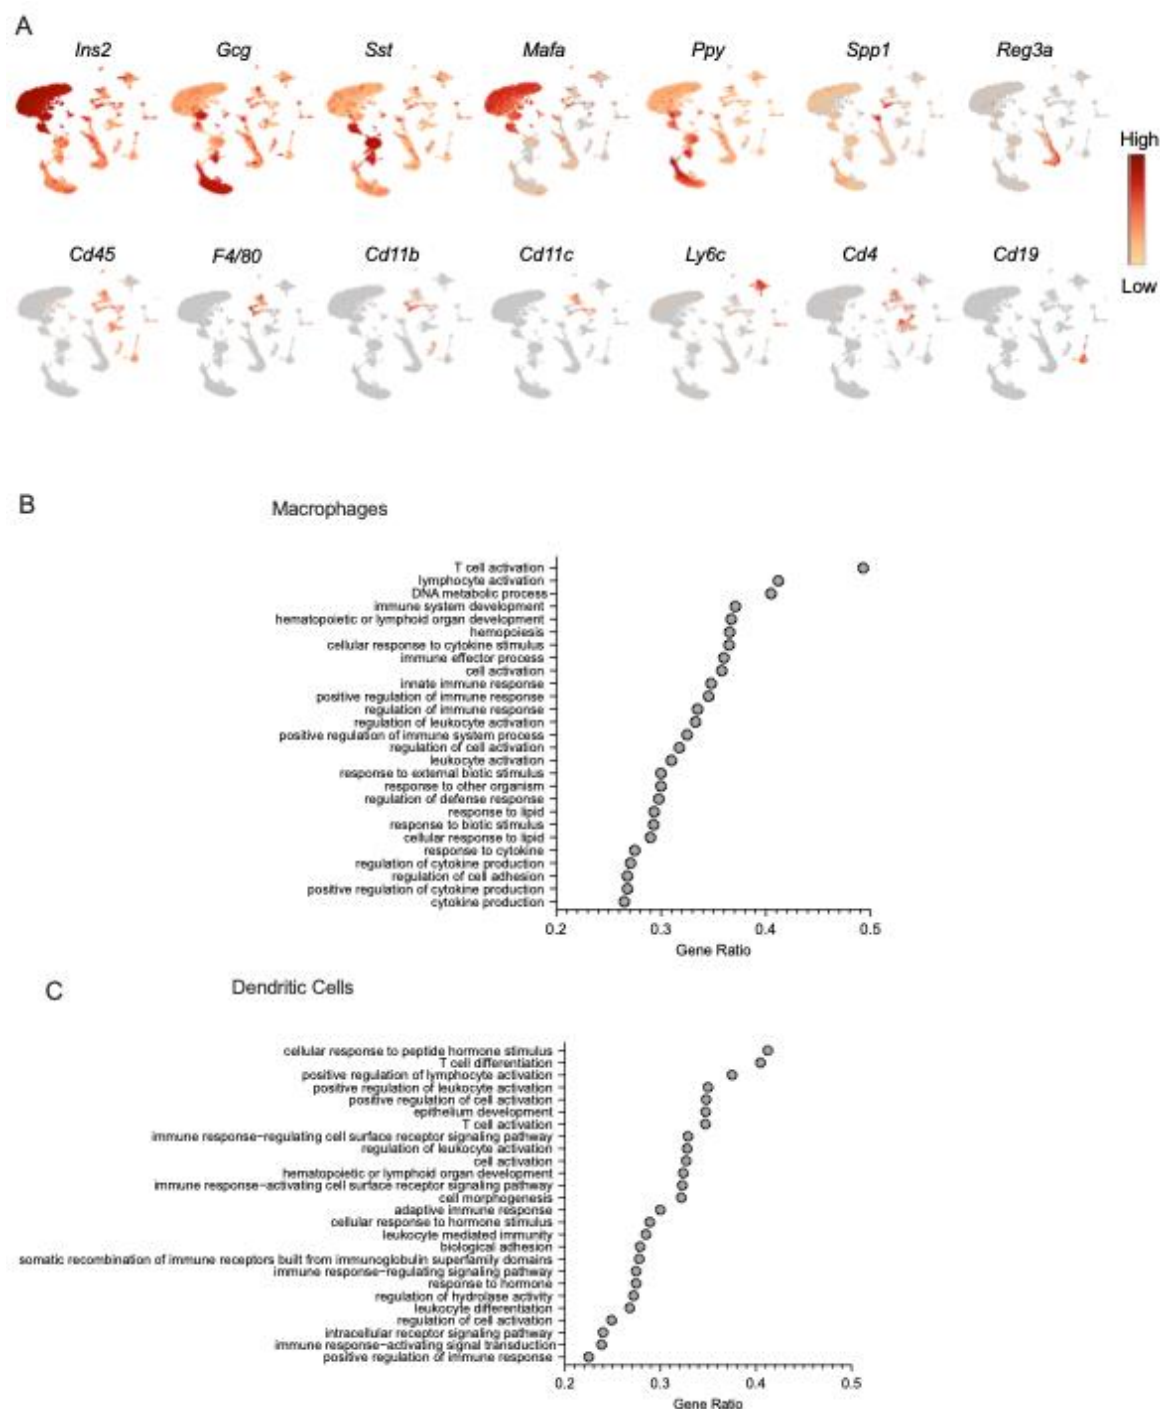

**Supplemental Figure S3: Single-cell RNA-seq analysis of islets of control and  $NOD-\Delta\beta$  mice, related to STARS methods, Figure 4, and Figure 5.** Islets were isolated from  $NOD-Cre+$  and  $NOD-\Delta\beta$  mice at 8 weeks of age, dissociated into single cells, and analyzed for scRNA-seq using 10x genomics. (A) Markers for 7 major populations of immune cells inside the islets: CD45, F4/80, CD11b, CD11c, Ly6c, CD4 and CD19. Color assignments represent levels of expression. (B,C) GO-GSEA analysis performed in macrophage and dendritic cell clusters.

### Skipped Exon

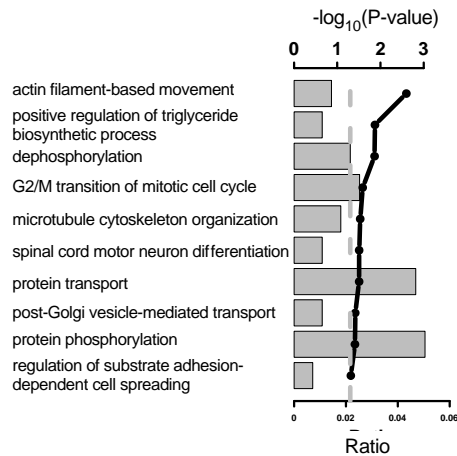

### Mutually Exclusive Exons

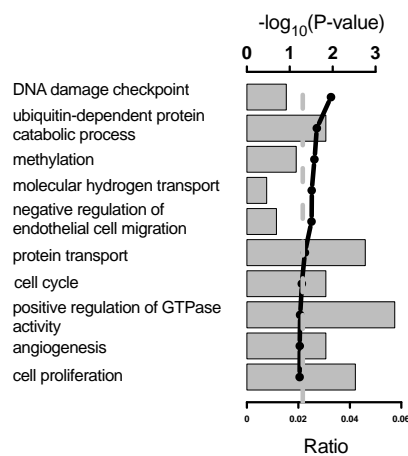

### Alternative 5' Splice Site

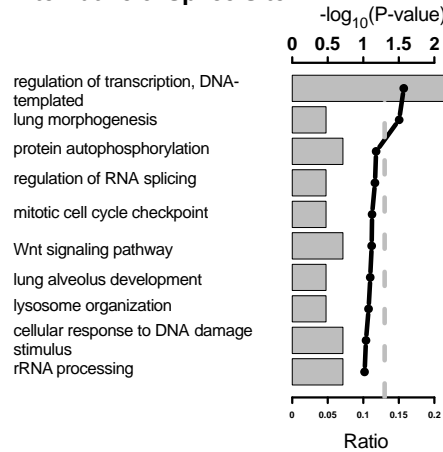

### Alternative 3' Splice Site

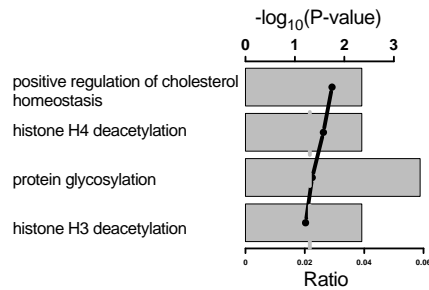

### Retained Intron

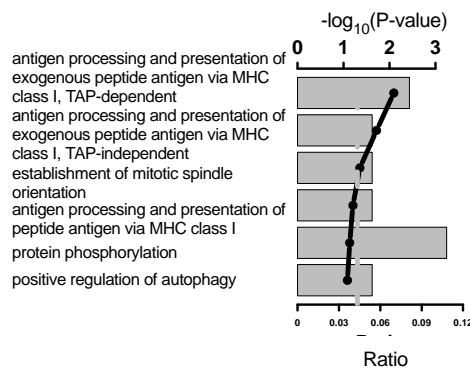

**Supplemental Figure S4: Gene ontology pathway analysis of alternatively spliced transcripts in cytokine-treated human islets, related to Figure 6.** Publicly available data from human islets (N=10 donors) treated with proinflammatory cytokines or control conditions were subjected to Gene Ontology pathway analysis for each of 5 mRNA splicing modes. Shown are the major Gene Ontology pathways and their respective p values and gene ratios.

**Supplemental Table S2: Human islet donor characteristics, related to STAR methods and Figure 6.**

| <b><i>Donor ID</i></b>   | <b>Age (yr)</b> | <b>Sex</b> | <b>Ethnicity /Race</b> | <b>BMI</b> | <b>Cause of Death</b>     | <b>History of Diabetes</b> | <b>Islet Source<sup>1</sup></b>              |
|--------------------------|-----------------|------------|------------------------|------------|---------------------------|----------------------------|----------------------------------------------|
| <i>RRID:SAMN19470079</i> | 39              | M          | White                  | 27.6       | Anoxia                    | No                         | IIDP; Scharp-Lacy                            |
| <i>RRID:SAMN19591106</i> | 61              | M          | Hispanic/<br>Latino    | 29.3       | Cerebrovascular<br>Stroke | No                         | IIDP; So CA Islet<br>Cell Resource<br>Center |
| <i>RRID:SAMN19897466</i> | 28              | F          | Hispanic/<br>Latino    | 24.7       | Cerebrovascular<br>Stroke | No                         | IIDP; University of<br>Pennsylvania          |
| <i>RRID:SAMN19859645</i> | 58              | M          |                        | 27.4       | Neurological              | No                         | University of<br>Alberta Islet Core          |
| <i>RRID:SAMN19796386</i> | 40              | M          |                        | 31.7       | Neurological              | No                         | University of<br>Alberta Islet Core          |

<sup>1</sup>IIDP = Integrated Islet Distribution Program

**Supplemental Table S3: Oligonucleotide sequences, Related to STAR Methods**

| <b>Mouse Gene</b>     | <b>Sequence</b>                 |
|-----------------------|---------------------------------|
| <i>Actb</i> Forward   | 5'-CCCTAGGCACCAGGGTGTGA-3'      |
| <i>Actb</i> Reverse   | 5'-GCCATGTTCAATGGGGTACTTC-3'    |
| <i>Alox15</i> forward | 5'-CTCTCAAGGCCTGTTCAAGGA-3'     |
| <i>Alox15</i> reverse | 5'-GTCCATTGTCCCCAGAACCT-3'      |
| <i>Atf4</i> forward   | 5'-GCAGTGTTGCTGTAACGGACA-3'     |
| <i>Atf4</i> reverse   | 5'-CGCTGTTCAAGGAAGCTCATCT-3'    |
| <i>Cd274</i> forward  | 5'-GCATTATATTCACAGCCTGC-3'      |
| <i>Cd274</i> reverse  | 5'-CCCTTCAAAAGCTGGTCCTT-3'      |
| <i>Il10</i> forward   | 5'-TGCACTACCAAAGCCACAAG-3'      |
| <i>Il10</i> reverse   | 5'-TAAGAGCAGGCAGCATAGCA-3'      |
| <i>Il12</i> forward   | 5'-ATGACCCTGTGCCTTGGTAG-3'      |
| <i>Il12</i> reverse   | 5'-TCTCCACAGGAGGTTTCTG-3'       |
| <i>Il1b</i> forward   | 5'-AACCTGCTGGTGTGTGACGTTT-3'    |
| <i>Il1b</i> reverse   | 5'-CAGCACGAGGCTTTTTTGTGT-3'     |
| <i>Il6</i> forward    | 5'-GAGGATACCACTCCCAACAGACC-3'   |
| <i>Il6</i> reverse    | 5'-AAGTGCATCATCGTTGTTTCATACA-3' |
| <i>Ins1</i> forward   | 5'-AGCAAGCAGGTCATTGTTCC-3'      |
| <i>Ins1</i> reverse   | 5'-GACGGGACTTGGGTGTGTAG-3'      |
| <i>Mafa</i> forward   | 5'-CCTGTAGAGGAAGCCGAGGAA-3'     |
| <i>Mafa</i> reverse   | 5'-CCTCCCCCAGTCGAGTATAGC-3'     |
| <i>Pdx1</i> forward   | 5'-CGGACATCTCCCCATACGAAG-3'     |
| <i>Pdx1</i> reverse   | 5'-CCCCAGTCTCGGTTCCATTC-3'      |
| <i>Xpb1s</i> forward  | 5'-CTGAGTCCGAATCAGGTGCAG-3'     |
| <i>Xpb1s</i> reverse  | 5'-GTCCATGGGAAGATGTTCTGG-3'     |
